# Supplementary material
Source: HighWire-hosted journal article supplement (https://bmjopen.bmj.com/content/9/8/e027569)
Supplement: inline-supplementary-material-1 [file inline-supplementary-material-1.pdf]

**eFigure 1. Flow chart of eligible study participants as per protocol restrictions**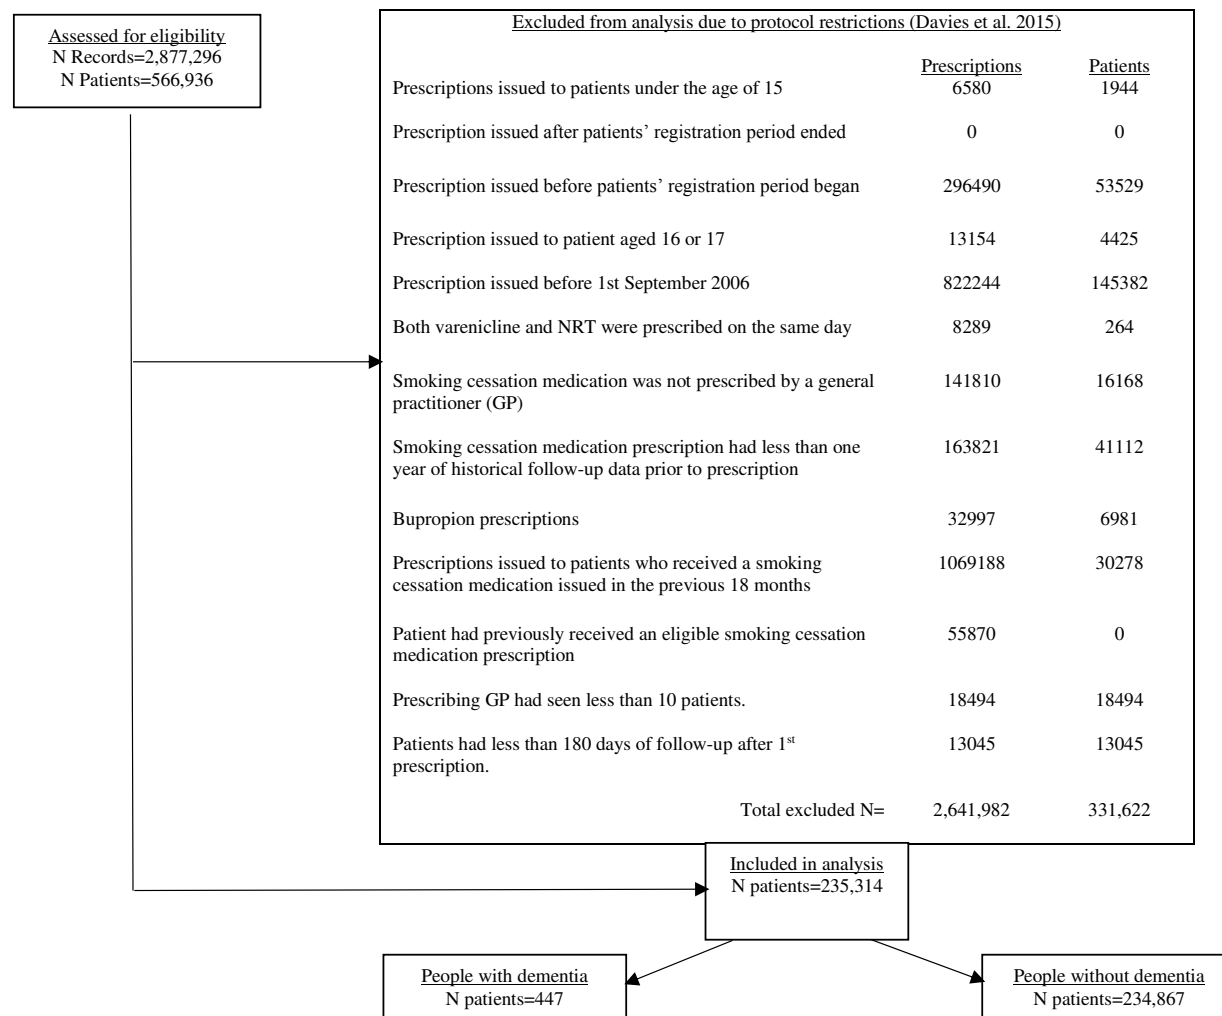

**eFigure 2. Age and sex standardised percentage (%) of primary care patients with an electronic medical record indicating smoking, from 2007 to 2015, in people with or without dementia**

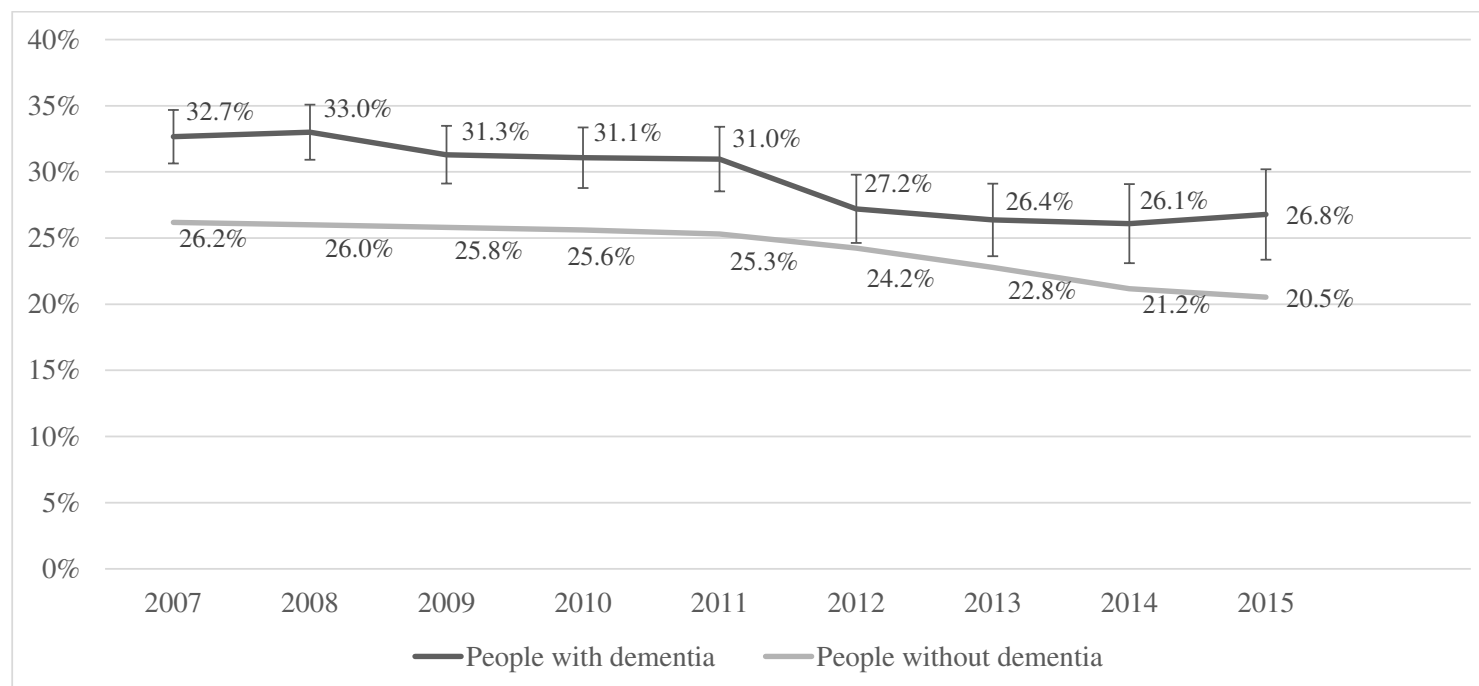

**Note on age and sex standardisation**

Smoking prevalence rates were directly age- and sex- standardised to account for differences in age and sex between groups with and without dementia. We used the CPRD population in 2015 as our standard population for calculating standardised smoking rates. Age was grouped into three categories (18-49, 50-59, 60+ years).

**eTable 1. List of dementia medications codes used in study cohort**

| Prodcodes | Product name                                                                |
|-----------|-----------------------------------------------------------------------------|
| 39363     | Ebixa 20mg tablets (Lundbeck Ltd)                                           |
| 58937     | Exelon 13.3mg/24hours transdermal patches (Novartis Pharmaceuticals UK Ltd) |
| 6225      | Memantine 10mg tablets                                                      |
| 11751     | Rivastigmine 3mg capsules                                                   |
| 7329      | Galantamine 20mg/5ml oral solution sugar free                               |
| 60723     | Rivastigmine 6mg capsules (Waymade Healthcare Plc)                          |
| 58780     | Voleze 9.5mg/24hours transdermal patches (Focus Pharmaceuticals Ltd)        |
| 39362     | Ebixa tablets treatment initiation pack (Lundbeck Ltd)                      |
| 56631     | Rivastigmine 13.3mg/24hours transdermal patches                             |
| 37132     | Rivastigmine 9.5mg/24hours transdermal patches                              |
| 56771     | Rivastigmine 3mg capsules (Dr Reddy's Laboratories (UK) Ltd)                |
| 20404     | Exelon 4.5mg capsules (Novartis Pharmaceuticals UK Ltd)                     |
| 57171     | Erastig 9.5mg/24hours transdermal patches (Teva UK Ltd)                     |
| 61676     | Donepezil 1mg/ml oral solution sugar free                                   |
| 24088     | Reminyl XL 24mg capsules (Shire Pharmaceuticals Ltd)                        |
| 11635     | Galantamine 12mg tablets                                                    |
| 60192     | Galantex XL 8mg capsules (Creo Pharma Ltd)                                  |
| 57627     | Erastig 4.6mg/24hours transdermal patches (Teva UK Ltd)                     |
| 11654     | Galantamine 8mg tablets                                                     |
| 2930      | Donepezil 5mg tablets                                                       |
| 5616      | Exelon 6mg capsules (Novartis Pharmaceuticals UK Ltd)                       |
| 58969     | Rivastigmine 4.6mg/24hours transdermal patches (A A H Pharmaceuticals Ltd)  |
| 48482     | Galsya XL 8mg capsules (Consilient Health Ltd)                              |
| 48442     | Donepezil 5mg orodispersible tablets                                        |
| 55928     | Exelon 4.5mg capsules (Waymade Healthcare Plc)                              |
| 53882     | Rivastigmine 2mg/ml oral solution                                           |
| 58709     | Donepezil 10mg tablets (A A H Pharmaceuticals Ltd)                          |
| 59871     | Donepezil 10mg/5ml oral suspension                                          |

|       |                                                                             |
|-------|-----------------------------------------------------------------------------|
| 55720 | Gatalin XL 24mg capsules (Aspire Pharma Ltd)                                |
| 7361  | Galantamine 24mg modified-release capsules                                  |
| 61476 | Acumor XL 24mg capsules (Generics (UK) Ltd)                                 |
| 57139 | Ebixa 10mg tablets (DE Pharmaceuticals)                                     |
| 62164 | Alzest 9.5mg/24hours transdermal patches (Dr Reddy's Laboratories (UK) Ltd) |
| 53922 | Donepezil 10mg orodispersible tablets (Consilient Health Ltd)               |
| 36848 | Aricept Evess 5mg orodispersible tablets (Eisai Ltd)                        |
| 60493 | Galantex XL 24mg capsules (Creo Pharma Ltd)                                 |
| 29288 | Reminyl 4mg/ml oral solution (Shire Pharmaceuticals Ltd)                    |
| 9966  | Ebixa 5mg/pump actuation oral solution (Lundbeck Ltd)                       |
| 58947 | Donepezil 10mg tablets (Accord Healthcare Ltd)                              |
| 5247  | Aricept 10mg tablets (Eisai Ltd)                                            |
| 11716 | Exelon 3mg capsules (Novartis Pharmaceuticals UK Ltd)                       |
| 61920 | Luventa XL 8mg capsules (Fontus Health Ltd)                                 |
| 10187 | Galantamine 4mg tablets                                                     |
| 37444 | Exelon 4.6mg/24hours transdermal patches (Novartis Pharmaceuticals UK Ltd)  |
| 18587 | Reminyl XL 8mg capsules (Shire Pharmaceuticals Ltd)                         |
| 56421 | Gatalin XL 8mg capsules (Aspire Pharma Ltd)                                 |
| 10255 | Galantamine 8mg modified-release capsules                                   |
| 4597  | Rivastigmine 1.5mg capsules                                                 |
| 9854  | Reminyl 4mg tablets (Shire Pharmaceuticals Ltd)                             |
| 61385 | Nemdatine 10mg tablets (Actavis UK Ltd)                                     |
| 11546 | Exelon 1.5mg capsules (Novartis Pharmaceuticals UK Ltd)                     |
| 14309 | Galantamine 16mg modified-release capsules                                  |
| 37188 | Aricept Evess 10mg orodispersible tablets (Eisai Ltd)                       |
| 5334  | Reminyl 12mg tablets (Shire Pharmaceuticals Ltd)                            |
| 56709 | Gatalin XL 16mg capsules (Aspire Pharma Ltd)                                |
| 2931  | Donepezil 10mg tablets                                                      |
| 61921 | Luventa XL 24mg capsules (Fontus Health Ltd)                                |
| 11827 | Rivastigmine 2mg/ml oral solution sugar free                                |
| 37957 | Exelon 9.5mg/24hours transdermal patches (Novartis Pharmaceuticals UK Ltd)  |

|       |                                                                      |
|-------|----------------------------------------------------------------------|
| 48015 | Galsya XL 24mg capsules (Consilient Health Ltd)                      |
| 53842 | Aricept 5mg tablets (Waymade Healthcare Plc)                         |
| 18800 | Ebixa 10mg tablets (Lundbeck Ltd)                                    |
| 59993 | Galantex XL 16mg capsules (Creo Pharma Ltd)                          |
| 36976 | Rivastigmine 4.6mg/24hours transdermal patches                       |
| 56600 | Donepezil 5mg tablets (Zentiva)                                      |
| 35088 | Donepezil 10mg orodispersible tablets sugar free                     |
| 5400  | Aricept 5mg tablets (Eisai Ltd)                                      |
| 59330 | Voleze 4.6mg/24hours transdermal patches (Focus Pharmaceuticals Ltd) |
| 18062 | Reminyl 8mg tablets (Shire Pharmaceuticals Ltd)                      |
| 11752 | Rivastigmine 4.5mg capsules                                          |
| 38976 | Memantine 5mg+10mg+15mg+20mg Tablet                                  |
| 35179 | Donepezil 5mg orodispersible tablets sugar free                      |
| 60107 | Donepezil 5mg tablets (Alliance Healthcare (Distribution) Ltd)       |
| 20140 | Reminyl XL 16mg capsules (Shire Pharmaceuticals Ltd)                 |
| 39240 | Memantine 20mg tablets                                               |
| 18556 | Exelon 2mg/ml oral solution (Novartis Pharmaceuticals UK Ltd)        |
| 9786  | Rivastigmine 6mg capsules                                            |
| 11837 | Memantine 10mg/ml oral solution sugar free                           |
| 48443 | Donepezil 10mg orodispersible tablets                                |
| 61618 | Nemdatine 20mg tablets (Actavis UK Ltd)                              |
| 12843 | Ginkyo 120mg tablets (Ceuta Healthcare Ltd)                          |
| 30120 | Ginkyo 50mg tablets (Ceuta Healthcare Ltd)                           |
| 61128 | HealthAid Ginko Vital (Biloba) 5g capsules (HealthAid Ltd)           |

**eTable 2. List of dementia diagnoses codes used in study cohort**

| medcode | readcode | readterm                                                 |
|---------|----------|----------------------------------------------------------|
| 26270   | Eu02500  | [X]Lewy body dementia                                    |
| 44674   | E002.00  | Senile dementia with depressive or paranoid features     |
| 19393   | Eu01z00  | [X]Vascular dementia, unspecified                        |
| 4693    | Eu02z00  | [X] Unspecified dementia                                 |
| 25704   | Eu00011  | [X]Presenile dementia,Alzheimer's type                   |
| 19477   | E004.00  | Arteriosclerotic dementia                                |
| 55313   | Eu01y00  | [X]Other vascular dementia                               |
| 30032   | E001200  | Presenile dementia with paranoia                         |
| 18386   | E002000  | Senile dementia with paranoia                            |
| 56912   | E004100  | Arteriosclerotic dementia with delirium                  |
| 33707   | E00..00  | Senile and presenile organic psychotic conditions        |
| 4357    | Eu02z14  | [X] Senile dementia NOS                                  |
| 12710   | 6AB..00  | Dementia annual review                                   |
| 41089   | E002z00  | Senile dementia with depressive or paranoid features NOS |
| 9509    | Eu02300  | [X]Dementia in Parkinson's disease                       |
| 15165   | E001.00  | Presenile dementia                                       |
| 49513   | E001100  | Presenile dementia with delirium                         |
| 42602   | E001000  | Uncomplicated presenile dementia                         |
| 7572    | F116.00  | Lewy body disease                                        |
| 30706   | Eu00200  | [X]Dementia in Alzheimer's dis, atypical or mixed type   |
| 1916    | E00..11  | Senile dementia                                          |
| 55467   | E004200  | Arteriosclerotic dementia with paranoia                  |
| 9565    | Eu01.11  | [X]Arteriosclerotic dementia                             |
| 8934    | Eu01200  | [X]Subcortical vascular dementia                         |
| 31016   | Eu01300  | [X]Mixed cortical and subcortical vascular dementia      |
| 43089   | E004000  | Uncomplicated arteriosclerotic dementia                  |
| 11175   | Eu01100  | [X]Multi-infarct dementia                                |
| 42279   | E004z00  | Arteriosclerotic dementia NOS                            |
| 29386   | Eu00z00  | [X]Dementia in Alzheimer's disease, unspecified          |
| 38438   | E001z00  | Presenile dementia NOS                                   |
| 8634    | E004.11  | Multi infarct dementia                                   |
| 1917    | F110.00  | Alzheimer's disease                                      |
| 61528   | Eu00013  | [X]Alzheimer's disease type 2                            |
| 1350    | E00..12  | Senile/presenile dementia                                |
| 38678   | Eu00100  | [X]Dementia in Alzheimer's disease with late onset       |
| 27677   | E001300  | Presenile dementia with depression                       |
| 46762   | Eu00111  | [X]Alzheimer's disease type 1                            |
| 11379   | Eu00112  | [X]Senile dementia,Alzheimer's type                      |
| 21887   | E002100  | Senile dementia with depression                          |
| 2882    | E00z.00  | Senile or presenile psychoses NOS                        |
| 25386   | E041.00  | Dementia in conditions EC                                |
| 49263   | Eu00000  | [X]Dementia in Alzheimer's disease with early onset      |
| 59122   | Fyu3000  | [X]Other Alzheimer's disease                             |
| 34944   | Eu02z13  | [X] Primary degenerative dementia NOS                    |

|        |         |                                                              |
|--------|---------|--------------------------------------------------------------|
| 40805  | 9hD1.00 | Excepted from dementia quality indicators: Informed dissent  |
| 37015  | E003.00 | Senile dementia with delirium                                |
| 6578   | Eu01.00 | [X]Vascular dementia                                         |
| 7323   | E000.00 | Uncomplicated senile dementia                                |
| 55838  | Eu01111 | [X]Predominantly cortical dementia                           |
| 29512  | F112.00 | Senile degeneration of brain                                 |
| 12621  | Eu02.00 | [X]Dementia in other diseases classified elsewhere           |
| 7664   | Eu00.00 | [X]Dementia in Alzheimer's disease                           |
| 60059  | Eu00012 | [X]Primary degen dementia, Alzheimer's type, presenile onset |
| 15249  | E00y.00 | Other senile and presenile organic psychoses                 |
| 43346  | Eu00113 | [X]Primary degen dementia of Alzheimer's type, senile onset  |
| 53446  | Eu04100 | [X]Delirium superimposed on dementia                         |
| 43292  | E004300 | Arteriosclerotic dementia with depression                    |
| 32057  | F110100 | Alzheimer's disease with late onset                          |
| 8195   | Eu00z11 | [X]Alzheimer's dementia unspec                               |
| 64267  | Eu02y00 | [X]Dementia in other specified diseases classif elsewhere    |
| 46488  | Eu01000 | [X]Vascular dementia of acute onset                          |
| 27759  | Eu02z16 | [X] Senile dementia, depressed or paranoid type              |
| 16797  | F110000 | Alzheimer's disease with early onset                         |
| 48501  | Eu02z11 | [X] Presenile dementia NOS                                   |
| 109047 | 8BPa.00 | Antipsychotic drug therapy for dementia                      |
| 106311 | 8CMZ.00 | Dementia care plan                                           |
| 103445 | 8H1a.00 | Referral to dementia care advisor                            |
| 44341  | 9hD..00 | Exception reporting: dementia quality indicators             |
| 28402  | Eu02000 | [X]Dementia in Pick's disease                                |
| 54106  | Eu02100 | [X]Dementia in Creutzfeldt-Jakob disease                     |
| 37014  | Eu02200 | [X]Dementia in Huntington's disease                          |
| 41185  | Eu02400 | [X]Dementia in human immunodef virus [HIV] disease           |
| 5931   | 1461    | H/O: dementia                                                |
| 11136  | F111.00 | Pick's disease                                               |
| 62132  | E02y100 | Drug-induced dementia                                        |
| 2731   | F11z.11 | Cerebral atrophy                                             |
| 54744  | F11x200 | Cerebral degeneration due to cerebrovascular disease         |

**eTable 3. Distributions of imputed characteristics in the imputation datasets**

| Characteristic                | People with dementia<br>(N=447) |                   |                       |                   |       |                   |                         | People without dementia<br>(N=234,867) |                   |                           |                   |       |                   |                         |
|-------------------------------|---------------------------------|-------------------|-----------------------|-------------------|-------|-------------------|-------------------------|----------------------------------------|-------------------|---------------------------|-------------------|-------|-------------------|-------------------------|
|                               | NRT (N=409)                     |                   | Varenicline<br>(N=38) |                   | Total |                   | % of<br>data<br>imputed | NRT<br>(N=159,327)                     |                   | Varenicline<br>(N=75,540) |                   | Total |                   | % of<br>data<br>imputed |
|                               | Mean                            | Standard<br>error | Mean                  | Standard<br>error | Mean  | Standard<br>error |                         | Mean                                   | Standard<br>error | Mean                      | Standard<br>error | Mean  | Standard<br>error |                         |
| Body mass index               | 24.6                            | 0.28              | 26.6                  | 1.02              | 24.7  | 0.27              | 10.3                    | 26.4                                   | 0.02              | 26.5                      | 0.02              | 26.4  | 0.01              | 14.1                    |
| Index of multiple deprivation | 3.3                             | 0.08              | 3.3                   | 0.3               | 3.3   | 0.09              | 53.2                    | 3.3                                    | 0.004             | 3.2                       | 0.007             | 3.3   | 0.003             | 43.6                    |



**eTable 4. Raw numbers for smoking prevalence calculations amongst people with and without dementia, 2007-2015**

| <b>Year</b>                                     | 2007      | 2008      | 2009      | 2010      | 2011      | 2012      | 2013      | 2014      | 2015      |
|-------------------------------------------------|-----------|-----------|-----------|-----------|-----------|-----------|-----------|-----------|-----------|
| <b><i>People with dementia</i></b>              |           |           |           |           |           |           |           |           |           |
| Numerator (number of smokers with dementia)     | 2,965     | 3,126     | 3,326     | 3,495     | 3,678     | 3,513     | 3,335     | 3,033     | 2,690     |
| Denominator (number people with dementia)       | 27,432    | 29664     | 32,090    | 34,391    | 36,284    | 38,251    | 40,043    | 39,665    | 36,249    |
| <b><i>People without dementia</i></b>           |           |           |           |           |           |           |           |           |           |
| Numerator (number of smokers without dementia)  | 1,010,530 | 1,013,985 | 1,018,065 | 1,015,538 | 987,193   | 930,783   | 866,310   | 748,084   | 628,444   |
| Denominator (number of people without dementia) | 3,860,169 | 3,895,542 | 3,936,638 | 3,955,107 | 3,892,231 | 3,830,563 | 3,795,481 | 3,536,957 | 3,068,743 |

**eTable 5. The likelihood of smokers with ever dementia diagnosis being prescribed varenicline versus NRT, as compared to smokers with no ever dementia diagnosis, N=235,314**

|                                                                                                                                                                                                                                                                                                                                                                                                                                                                                                                                                                                                                                                                                                                                                                                                                      | <b>Partially adjusted odds ratio<br/>(95% confidence interval) †</b> | <b>Fully adjusted odds ratio<br/>(95% confidence interval) ††</b> |
|----------------------------------------------------------------------------------------------------------------------------------------------------------------------------------------------------------------------------------------------------------------------------------------------------------------------------------------------------------------------------------------------------------------------------------------------------------------------------------------------------------------------------------------------------------------------------------------------------------------------------------------------------------------------------------------------------------------------------------------------------------------------------------------------------------------------|----------------------------------------------------------------------|-------------------------------------------------------------------|
| Ever dementia diagnosis                                                                                                                                                                                                                                                                                                                                                                                                                                                                                                                                                                                                                                                                                                                                                                                              | 0.21 (0.15 to 0.29)                                                  | 0.26 (0.18 to 0.36)                                               |
| ‡Partially adjusted models were adjusted for: age, sex, year of first prescription.<br>†† Fully adjusted models were adjusted for: age, sex, days in history, IMD, number of GP visits 1-year prior to first prescription, BMI, year of first prescription, history of major physical morbidity (Charlson Index), alcohol misuse ever, drug misuse ever, depression ever, neurotic disorder ever, self-harm ever, antidepressant prescription ever, antipsychotic prescription ever, hypnotics/anxiolytics prescription ever, other psychotropic medication ever, and other behavioral/neurologic disorder ever. Missing BMI and IMD values were imputed using multiple imputation.<br>Models were estimated using cluster robust standard errors to account for potential clustering of patients between practices. |                                                                      |                                                                   |

**eTable 6. Number and percentage (%) of people with an electronic medical record indicating smoking cessation at 3, 6 and 9-months, and 1, 2, and 4-years follow-up, in people with and without dementia**

|                                     | <b>3-months</b>  | <b>6-months</b>  | <b>9-months</b>  | <b>1-year</b>    | <b>2-years</b>   | <b>4-years</b>   |
|-------------------------------------|------------------|------------------|------------------|------------------|------------------|------------------|
| People without dementia<br>N=234867 | 36223<br>(15.4%) | 45796<br>(19.5%) | 50193<br>(21.4%) | 53263<br>(22.7%) | 60257<br>(25.7%) | 69842<br>(29.7%) |
| People with dementia<br>N=447       | 51<br>(11.4%)    | 77<br>(17.2%)    | 92<br>(20.6%)    | 102<br>(22.8%)   | 137<br>(30.6%)   | 155<br>(34.7%)   |

**eTable 7. Fully adjusted odds ratios and 95% confidence intervals for the association between the diagnosis of dementia and smoking cessation at 3, 6 and 9-months and 1, 2, and 4-years after prescription**

| Fully adjusted odds ratio (95% confidence interval) †                                                                                                                                                                                                                                                                                                                                                                                                                                                                                                                                                             |                     |                     |                     |                     |                    |                     |
|-------------------------------------------------------------------------------------------------------------------------------------------------------------------------------------------------------------------------------------------------------------------------------------------------------------------------------------------------------------------------------------------------------------------------------------------------------------------------------------------------------------------------------------------------------------------------------------------------------------------|---------------------|---------------------|---------------------|---------------------|--------------------|---------------------|
|                                                                                                                                                                                                                                                                                                                                                                                                                                                                                                                                                                                                                   | 3-months            | 6-months            | 9-months            | 1-year              | 2-years            | 4-years             |
| (N=235,314)                                                                                                                                                                                                                                                                                                                                                                                                                                                                                                                                                                                                       | 0.56 (0.41 to 0.75) | 0.64 (0.49 to 0.83) | 0.71 (0.56 to 0.90) | 0.75 (0.60 to 0.94) | 1.0 (0.81 to 1.23) | 1.04 (0.85 to 1.26) |
| † Fully adjusted models were adjusted for: type of prescription, age, sex, days in history, IMD, number of GP visits 1-year prior to first prescription, BMI, year of first prescription, history of major physical morbidity (Charlson Index), alcohol misuse ever, drug misuse ever, depression ever, neurotic disorder ever, self-harm ever, antidepressant prescription ever, antipsychotic prescription ever, hypnotics/anxiolytics prescription ever, other psychotropic medication ever, and other behavioral/neurologic disorder ever. Missing BMI and IMD values were imputed using multiple imputation. |                     |                     |                     |                     |                    |                     |
